# Supplementary material for: The Network of Interactions Between Classical Swine Fever Virus Nonstructural Protein p7 and Host Proteins
Source: Front Microbiol. 2020 Nov 30;11:597893. doi: 10.3389/fmicb.2020.597893 (PMC7733924; doi:10.3389/fmicb.2020.597893)
Supplement: Supplementary file 2 [file Table_2.XLSX]

## Sheet: Sheet1
Table S2. Host proteins in the p7-cellular protein interaction network using for GO and KEGG analysis.
Host proteins
PSMA1
PSMA6
PSMD4
TBP10
PSMD3
PSMD13
PSMD2
PSMD12
PSMB1
PSMD8
PSMC1
PSMC2
PSMC3
PSMA4
PSMC6
PSMB3
PSMB7
UBE2I
PSMA3
PSMB4
PSMB6
COPS4
COPS5
PSMD6
PSMA2
SUMO2
PSMA7
PSMA5
PSMA8
SUMO1
ENSSSCG00000027274
COPS8
COPS2
DCUN1D1
CUL1
COPS3
ENSSSCG00000022740
NEDD8
RANGAP1
ACTR1A
ENSSSCG00000001468
SKP2
RANBP2
ENSSSCG00000006830
DCTN1
DCTN2
PAFAH1B1
SUMO3
RNF7
TCEB1
COPS7A
PIAS1
DCTN3
DCUN1D2
COPS7B
FBXW7
ENSSSCG00000023884
MAPRE1
FBXW11
BTRC
DYNC1I1
DYNC1I2
CUL3
POMP
FBXL4
DYNC1H1
ENSSSCG00000029478
CUL4B
ENSSSCG00000026839
ENSSSCG00000024811
VDAC1
CNTN1
GGNBP2
NFASC
CNTNAP1
PTPRZ1
NRCAM
PODXL
STAR
SLC25A6
SLC25A4
TSPO
ANT3
TOMM20
VDAC1P5
STARD3
PRKCE
PPIF
SLC25A31
NEURL1
